# Supplementary material for: Autophagy Controls an Intrinsic Host Defense to Bacteria by Promoting Epithelial Cell Survival: A Murine Model
Source: PubMed Central journal article supplement (PMC3834267; doi:10.1371/journal.pone.0081095), 2013-11-19

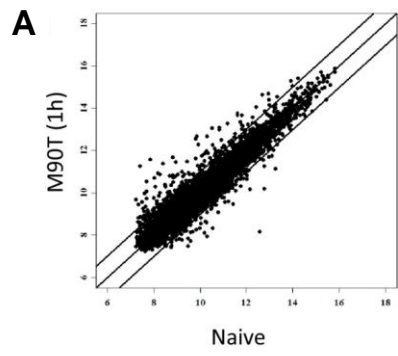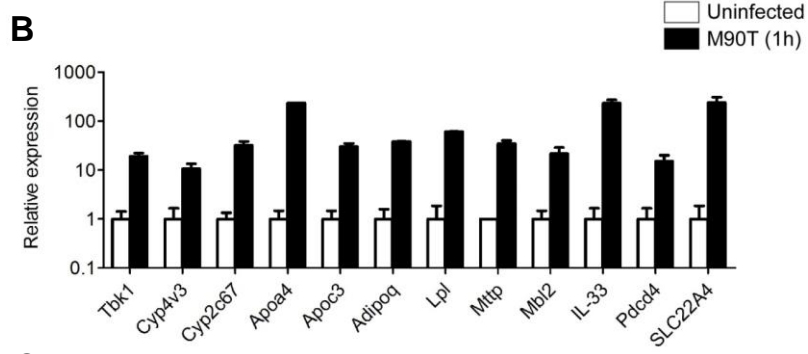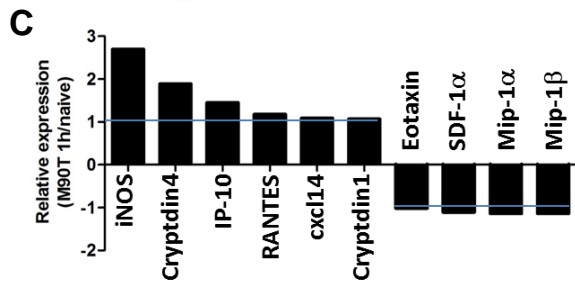

Supplement: pone.0081095.s003.pdf [file pone.0081095.s003.pdf]
