# Supplementary material for: Autophagy Controls an Intrinsic Host Defense to Bacteria by Promoting Epithelial Cell Survival: A Murine Model
Source: PubMed Central journal article supplement (PMC3834267; doi:10.1371/journal.pone.0081095), 2013-11-19
Supplement: pone.0081095.s011.pdf [file pone.0081095.s011.pdf]

Table S1. List of specific primer sets used for real time-PCR

| <b>Target gene symbol</b> | <b>Product size (bp)</b> | <b>Forward sequence</b> | <b>Reverse sequence</b> |
|---------------------------|--------------------------|-------------------------|-------------------------|
| SLC22A4                   | 232                      | CCTGTTCTGTGTTCCCCTGT    | GGTTATGGTGGCAATGTTCC    |
| Il-33                     | 207                      | TTGGCTTACGATGTTGTGGA    | ACTGTGGTGCTGCTCTTCT     |
| Lpl                       | 167                      | GGGCTCTGCCTGAGTTGTAG    | CCATCCTCAGTCCCAGAAAA    |
| Mttp                      | 162                      | CACTCAGGCAATTCGAGACA    | TATCGCTTTCTGGCTGAGGT    |
| Mbl2                      | 229                      | ATTGCTACTTGGGCATCAC     | GAGGGCTGAGAAACAAGCAC    |
| Adipoq                    | 192                      | GTTGCAAGCTCTCCTGTTCC    | TCTCCAGGAGTGCCATCTCT    |
| Pdcd4                     | 235                      | GGAGGGACAGAAGAGGAACC    | CTCAAAGCACAGCATTTCOA    |
| Tbk1                      | 208                      | GAGTACCTGCATCCGGACAT    | ATATTGCACCAGACGGCTTC    |
| Apoc3                     | 158                      | CTAACCTGAGGACCAACCA     | GGAGGGGTGAAGACATGAGA    |
| Apoa4                     | 173                      | CCTTTATGAGCACCTGGAA     | AGGTGTCTGCTGCTGTGATG    |
| Cyp4v3                    | 227                      | CCCAACAACGCAGAATTTTT    | CATTTGCTCCCCGTACTIONT   |
| Cyp2c67                   | 168                      | GCAGGAAAACGGATTTGTGT    | CATCTGGAAATTGGGAGGAA    |
| DNase1                    | 157                      | ACTCAATCGGGACAAACCTG    | ATTTCCACAGGGTTCACAGC    |
| Maob                      | 160                      | TGATCTCTCGTGTGCCTTG     | GCATAGGTGCCATCTGGTTT    |

Supplementary Table 2. List of the gene in the biological process whose expression levels were different by more than two-fold between naïve and M90T-infected mice.

| Target ID                                         | Symbol   | Naive   | M90T (1h) | Fold change (M90T/naive) |
|---------------------------------------------------|----------|---------|-----------|--------------------------|
| <b>Cell communication and signal transduction</b> |          |         |           |                          |
| ILMN_2597769                                      | Igf2     | 270.31  | 1572.23   | <b>6.41</b>              |
| ILMN_2870672                                      | Fbln1    | 528.59  | 2753.71   | <b>5.63</b>              |
| ILMN_2813859                                      | Rbp2     | 560.10  | 1771.88   | <b>3.57</b>              |
| ILMN_1241535                                      | Tbk1     | 2693.14 | 5458.57   | <b>2.02</b>              |
| ILMN_1251000                                      | Tac1     | 1291.43 | 361.91    | <b>-3.18</b>             |
| ILMN_2652500                                      | Lrg1     | 1315.54 | 235.86    | <b>-5.10</b>             |
| <b>Metabolism</b>                                 |          |         |           |                          |
| ILMN_1251504                                      | Cyp4v3   | 2394.89 | 9792.75   | <b>4.26</b>              |
| ILMN_3074610                                      | Cyp2c67  | 486.28  | 1378.84   | <b>3.18</b>              |
| ILMN_2834123                                      | Apoa4    | 977.74  | 6471.89   | <b>7.03</b>              |
| ILMN_2651539                                      | Apoc3    | 1898.27 | 8090.53   | <b>4.47</b>              |
| ILMN_2980044                                      | Asah2    | 1531.31 | 8591.21   | <b>5.80</b>              |
| ILMN_2990661                                      | Pnliprp2 | 1028.51 | 4836.58   | <b>5.12</b>              |
| ILMN_1246265                                      | Clps     | 1900.15 | 8603.42   | <b>4.84</b>              |
| ILMN_2871249                                      | Rdh7     | 212.29  | 1008.69   | <b>5.17</b>              |
| ILMN_2738082                                      | Adipoq   | 165.14  | 482.38    | <b>2.68</b>              |
| ILMN_2692723                                      | Lpl      | 372.78  | 796.91    | <b>2.17</b>              |
| ILMN_2628594                                      | Mttp     | 950.98  | 1969.08   | <b>2.04</b>              |
| <b>Immunity</b>                                   |          |         |           |                          |
| ILMN_2835423                                      | Cfd      | 170.93  | 2352.28   | <b>14.48</b>             |
| ILMN_1258500                                      | Mbl2     | 162.16  | 423.69    | <b>2.79</b>              |
| ILMN_1259747                                      | IL-33    | 218.23  | 455.13    | <b>2.17</b>              |
| ILMN_1251000                                      | Tac1     | 1291.43 | 361.91    | <b>-3.18</b>             |
| ILMN_2826869                                      | Saa1     | 775.92  | 221.83    | <b>-3.09</b>             |
| <b>Apoptotic processes</b>                        |          |         |           |                          |
| ILMN_2734251                                      | Dnase1   | 240.02  | 2985.49   | <b>13.20</b>             |
| ILMN_2719069                                      | Maob     | 357.64  | 2865.63   | <b>7.92</b>              |
| ILMN_1222679                                      | Cidec    | 272.34  | 580.79    | <b>2.38</b>              |
| ILMN_2898878                                      | Pdcd4    | 285.14  | 511.03    | <b>2.02</b>              |
| ILMN_1232884                                      | Sphk1    | 269.60  | 807.10    | <b>3.35</b>              |
| ILMN_2698046                                      | Stat3    | 589.72  | 1216.34   | <b>2.29</b>              |
| <b>Transport</b>                                  |          |         |           |                          |
| ILMN_2598877                                      | Slc7a8   | 303.61  | 1857.48   | <b>6.79</b>              |
| ILMN_2861259                                      | Slc2a2   | 281.58  | 1190.28   | <b>4.65</b>              |
| ILMN_1223035                                      | Slc22a4  | 323.36  | 650.67    | <b>2.28</b>              |
| ILMN_1251109                                      | Slc25a45 | 478.49  | 3189.66   | <b>7.30</b>              |
| ILMN_2943040                                      | Slc15a1  | 189.61  | 574.43    | <b>3.27</b>              |
| <b>Cell structure</b>                             |          |         |           |                          |
| ILMN_1249976                                      | Cfl2     | 325.79  | 1800.40   | <b>6.06</b>              |
| ILMN_2617433                                      | Actb     | 492.37  | 1604.52   | <b>3.71</b>              |
| ILMN_2738825                                      | Acta1    | 6217.79 | 270.19    | <b>-21.53</b>            |
